# Supplementary material
Source: Springer Nature journal article supplement (https://www.springermedizin.de/resource/supplementary/12943_2013_1493_MOESM10_ESM.pdf/9552702)

### LNCaP

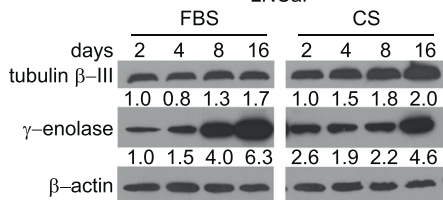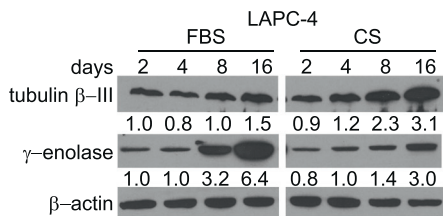

### B

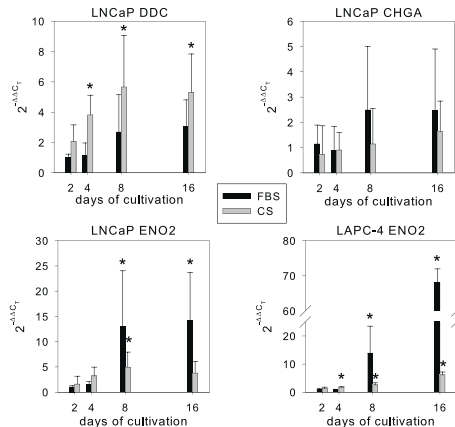

### C

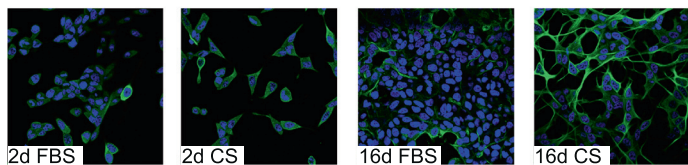

### D

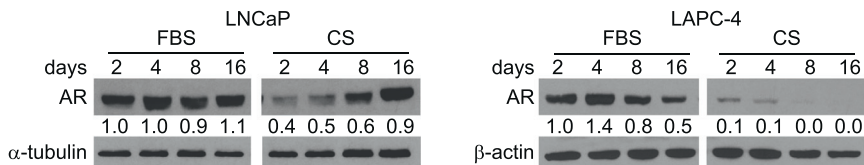

### E

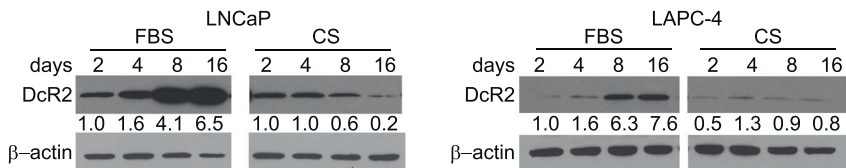

### F

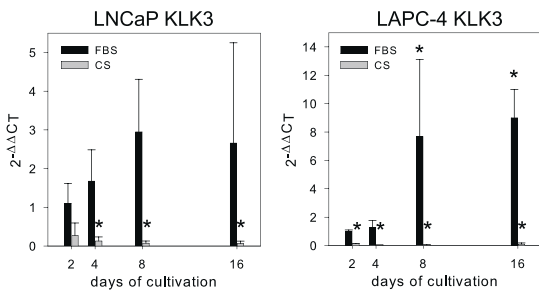

Supplement: MOESM10 [file 9552702]
